# Supplementary material
Source: PubMed Central journal article supplement (PMC7617137)
Supplement: EMS195130-supplement-supplemental_figures_and_tables.pdf [file EMS195130-supplement-supplemental_figures_and_tables.pdf]

**Supplemental information**

**IL-33-induced metabolic reprogramming  
controls the differentiation of alternatively activated  
macrophages and the resolution of inflammation**

**Maria Faas, Natacha Ipseiz, Jochen Ackermann, Stephan Culemann, Anika Grüneboom, Fenja Schröder, Tobias Rothe, Carina Scholtysek, Martin Eberhardt, Martin Böttcher, Philipp Kirchner, Cornelia Stoll, Arif Ekici, Maximilian Fuchs, Meik Kunz, Benno Weigmann, Stefan Wirtz, Roland Lang, Joerg Hofmann, Julio Vera, David Voehringer, Alessandro Michelucci, Dimitrios Mougikakos, Stefan Uderhardt, Georg Schett, and Gerhard Krönke**

### A Timeline Muscle Injury

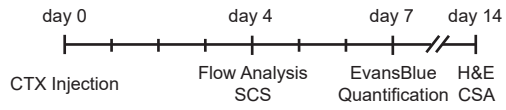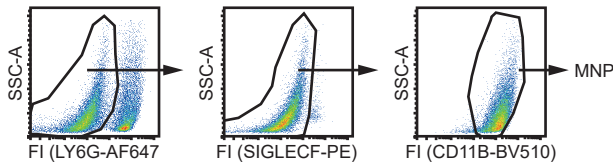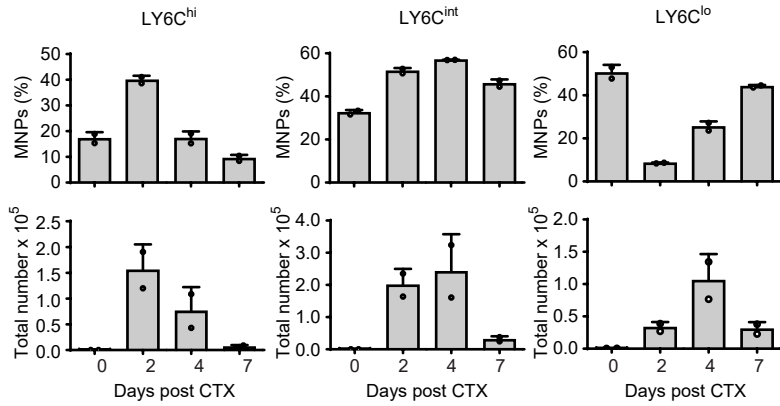

### B

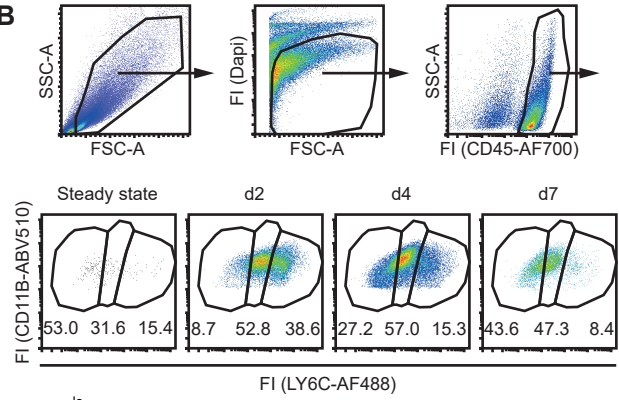

### C

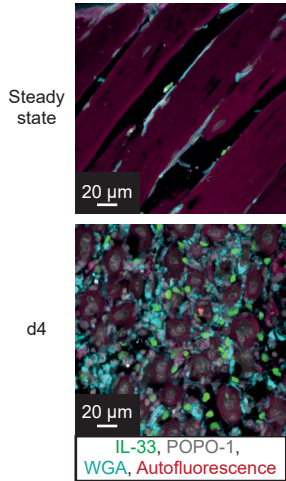

### D

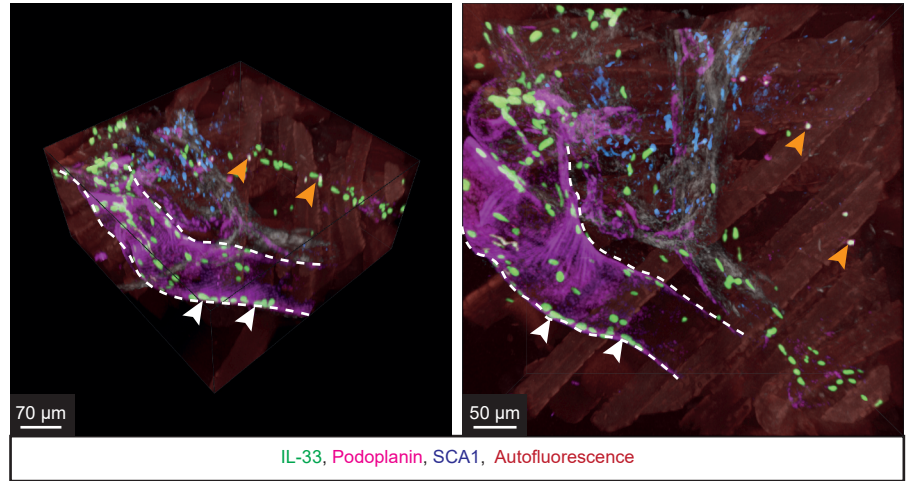

### E

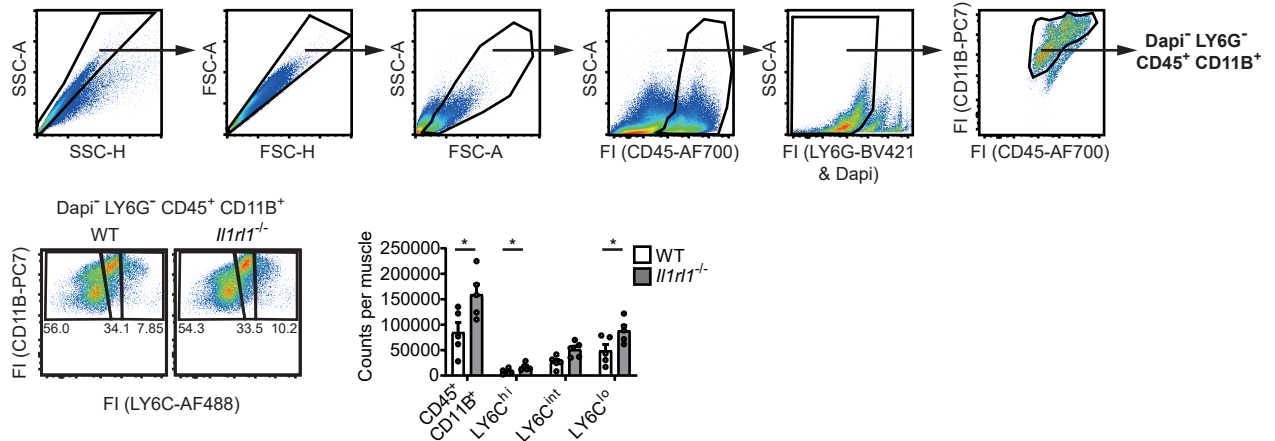

**Supplementary Figure 1: IL-33 promotes the resolution of injury-induced inflammation and the differentiation of AAMs. Related to Figure 1.**

(A) Overview of CTX-induced muscle injury and subsequent analyses.

(B) Flow cytometry of injured muscles at indicated days post CTX Injection. Bar graphs show the percentage as well as the absolute numbers of Dapi<sup>-</sup>, LY6G<sup>-</sup>, SIGLECF<sup>-</sup>, CD45<sup>+</sup>, CD11B<sup>+</sup> cells, referred to as mononuclear phagocytes (MNPs), distinguished by the intensity of LY6C signal.

(C-D) Immunofluorescence microscopy of muscle. IL-33 depicted in green, podoplanin in magenta, SCA1 in blue, wheat germ agglutinin (WGA) in cyan and autofluorescence in red. Muscle taken from steady state (C upper panel and D) as well as 4 d post CTX Injection (C lower panel). White dashed lines indicate a podoplanin<sup>+</sup> vessel structure; White arrows indicate exemplary podoplanin<sup>+</sup> and IL-33<sup>+</sup> cells; orange arrows indicate other IL-33<sup>+</sup> cells. See also Movie S1.

(E) Flow cytometry of injured muscles at day 4 post CTX injection gated on single mononuclear phagocytes (Dapi<sup>-</sup>, LY6G<sup>-</sup>, CD45<sup>+</sup>, CD11B<sup>+</sup>). Graph shows absolute counts per muscle. WT (n=5) and *Il1rl1*<sup>-/-</sup> (n=5).

Data are presented as mean + SEM. \*p < 0.05, \*\*p < 0.01, \*\*\*p < 0.001.

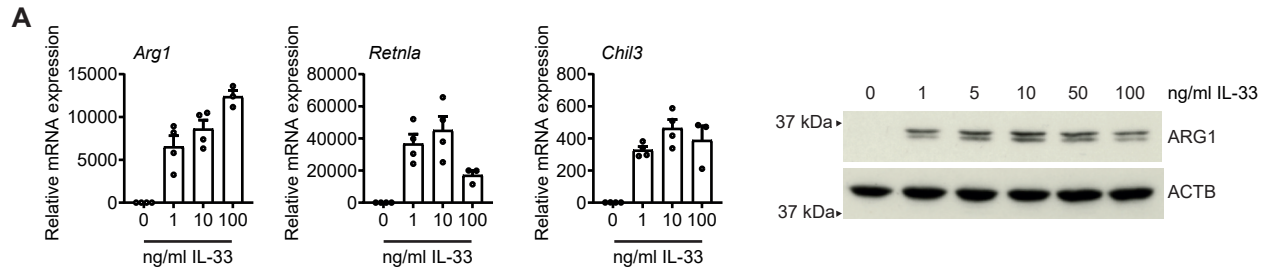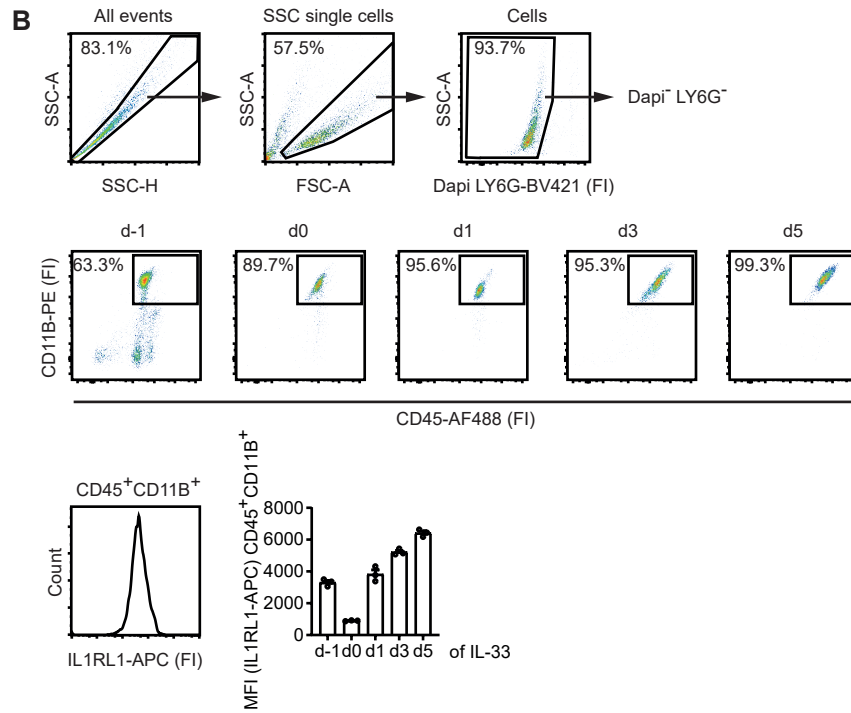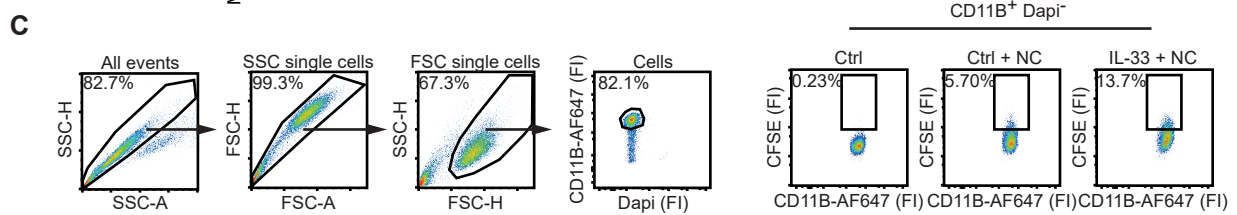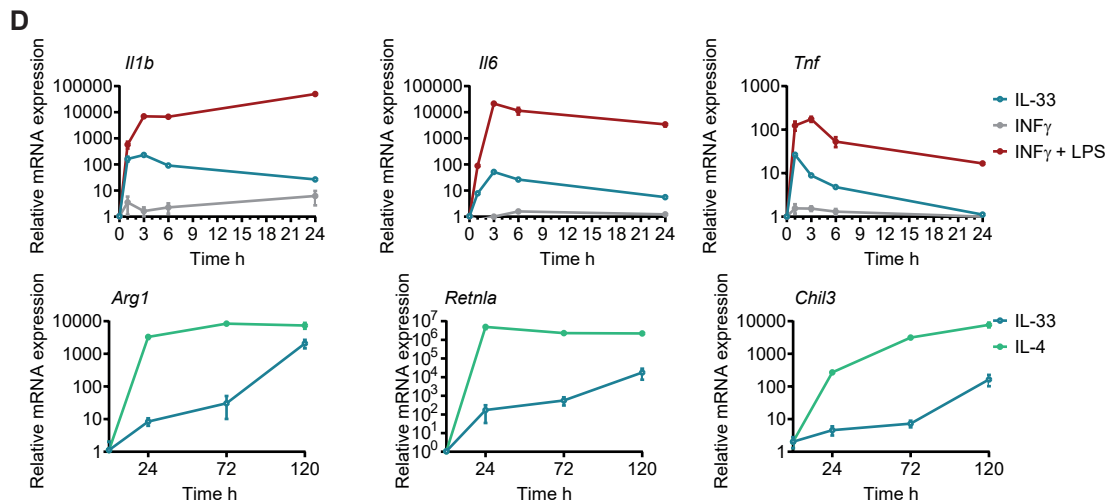

**Supplementary Figure 2: IL-33 triggers the IL-4-independent differentiation of AAMs. Related to Figure 1.**

(A) Quantitative real-time PCR-based measurement of mRNA expression of indicated genes and western blot-based determination of ARG1 expression in BMDMs upon stimulation with vehicle (Ctrl) or IL-33 at the indicated concentrations for 5 days.

(B) Flow cytometry determining IL1RL1 expression on BMDMs treated with 10 ng/ml IL-33 for the indicated time points with d-1 indicating the day of isolation and d0 indicating the day of IL-33 stimulation. Histogramm shows IL1RL1 expression on day 5.

(C) Gating strategy to measure the uptake of necrotic cells (NC) in BMDM treated with vehicle (Ctrl) or IL-33 (10 ng/ml for 5d).

(D) Relative mRNA expression of markers for classical activation (*Ii1b*, *Ii6*, *Tnf*) or markers for alternative activation in macrophages (*Arg1*, *Retnla*, *Chil3*) BMDMs upon stimulation with IL-33 (10 ng/ml), INF $\gamma$  (10 ng/ml), INF $\gamma$  + LPS (10 ng/ml) or IL-4 (20 ng/ml) for the indicated time points.

Data are presented as mean + SEM

**A**

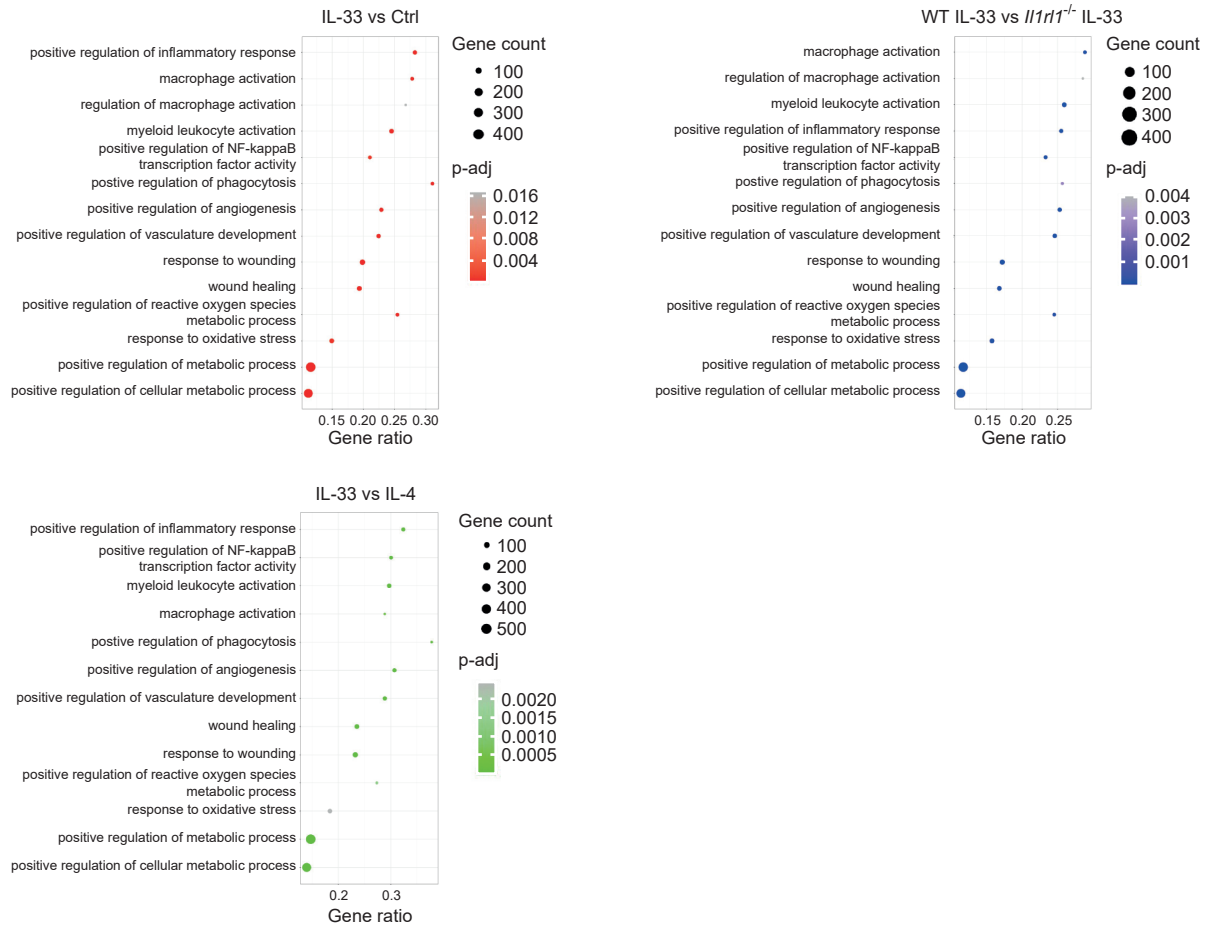

**B**

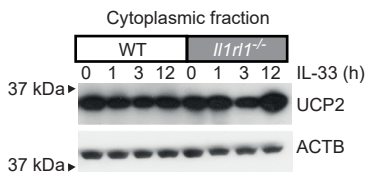

**C**

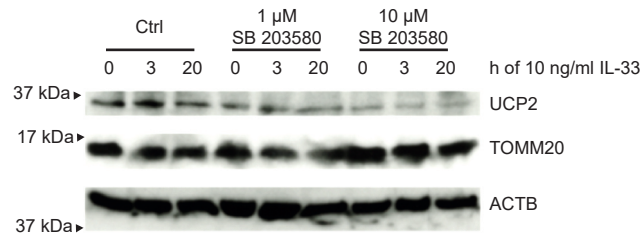

**D**

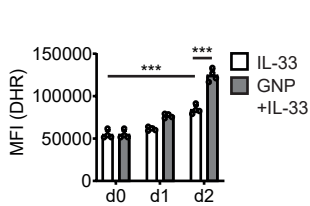

**E**

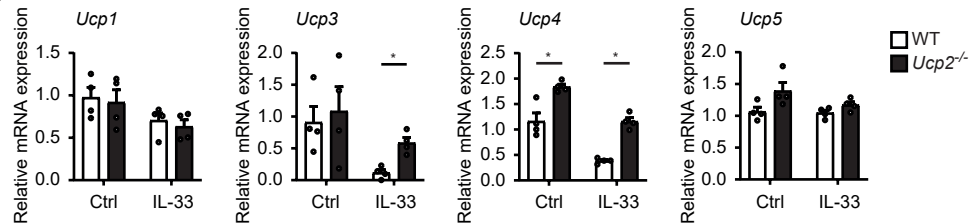

**F**

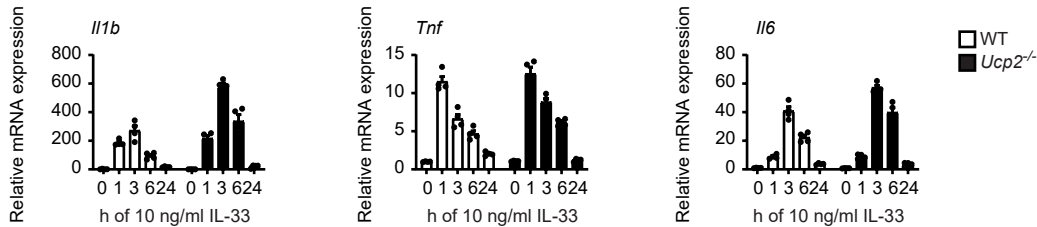

**Supplementary Figure 3: IL-33 induced mitochondrial rewiring promotes AAM differentiation. Related to Figure 3.**

(A) Pathway analysis of bulk mRNA sequencing data comparing vehicle (Ctrl) treated, IL-33 (10 ng/ml for 36 h) and IL-4 (20 ng/ml for 36 h) treated BMDM from WT or *I1rl1<sup>-/-</sup>*.

(B) Western Blot of UCP2 protein from cytoplasmic fractions of WT or *I1rl1<sup>-/-</sup>* BMDM treated with IL-33 (10 ng/ml) for the indicated time points. Samples shown are the corresponding cytoplasmic fractions to the mitochondrial fractions shown in Fig. 3 G.

(C) Western Blot of UCP2 protein from mitochondrial fractions BMDM treated with IL 33 (10 ng/ml) and/or SB203580 (1  $\mu$ M and 10  $\mu$ M) for the indicated time points.

(D) Flow cytometry data showing the mean fluorescence intensity (MFI) of DHR in BMDM treated with GNP (100  $\mu$ M) and/or IL-33 (10 ng/ml) for the indicated time points.

(E-F) Quantitative real-time PCR-based measurement of mRNA expression of indicated genes in BMDMs isolated from WT or *Ucp2<sup>-/-</sup>* mice treated with vehicle (Ctrl) or IL-33 (10 ng/ml for 5d).

Data are presented as mean + SEM. \*p < 0.05, \*\*p < 0.01, \*\*\*p < 0.001.

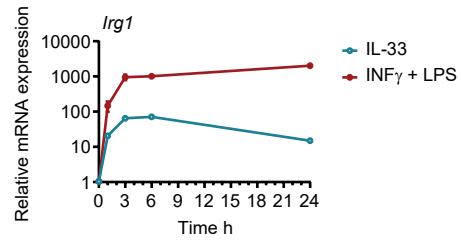

**Supplementary Figure 4: IL-33-mediated mitochondrial uncoupling results in the induction of the transcription factor GATA3. Related to Figure 4.**

Relative mRNA expression of *Irg1* in BMDMs upon stimulation with IL-33 (10 ng/ml) or INF $\gamma$  (10 ng/ml) + LPS (10 ng/ml) for the indicated time points.

Data are presented as mean +/- SEM.



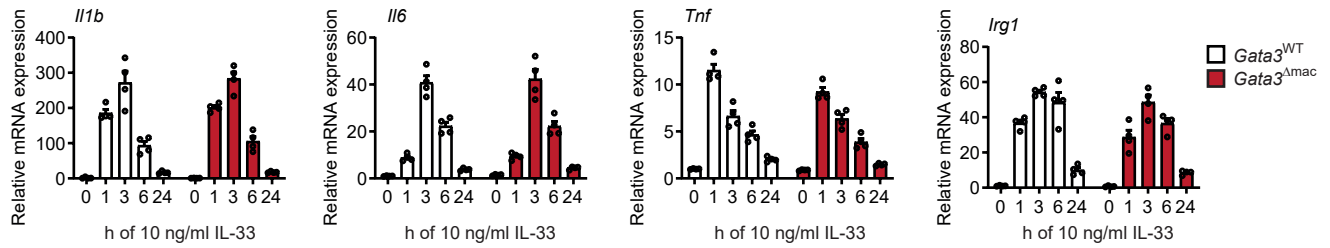

**Supplementary Figure 5: GATA3 controls the IL-33-induced polarization of AAMs. Related to Figure 5.**

Relative mRNA expression of indicated genes in BMDMs isolated from *Gata3*<sup>WT</sup> and *Gata3*<sup>Δmac</sup> mice upon stimulation with IL-33 (10 ng/ml) for the indicated time points. Data was generated from mRNA isolated from the same experiment as data shown in supplementary figure 3F.

Data are presented as mean + SEM.

**A** Gating strategy single cell sequencing

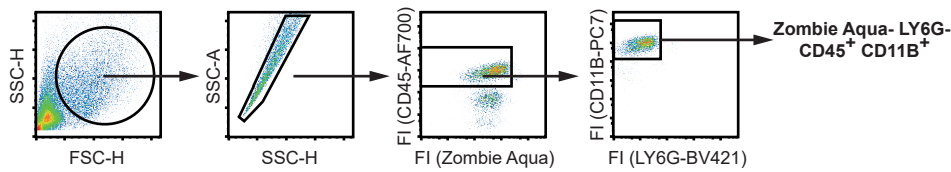

**B** Top 10 heatmap of cluster markers

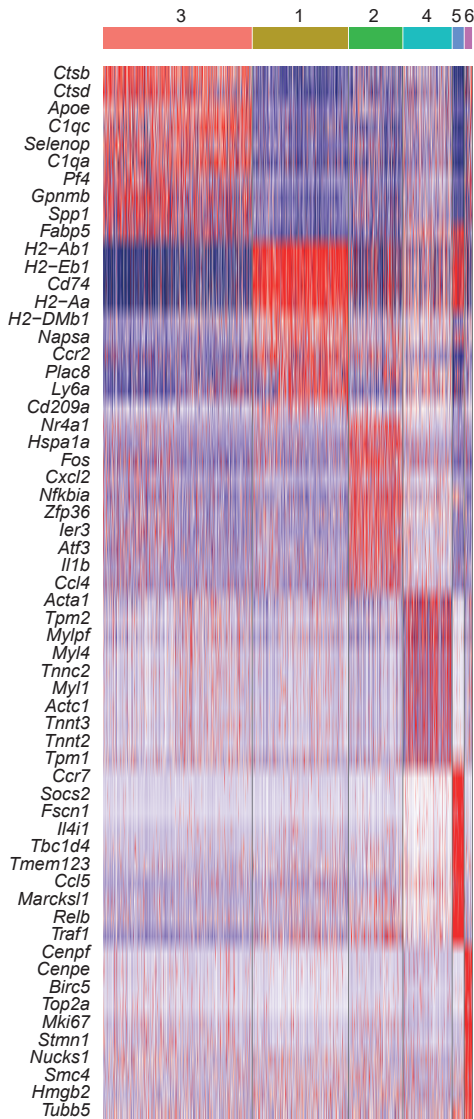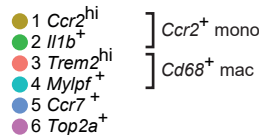

**C**

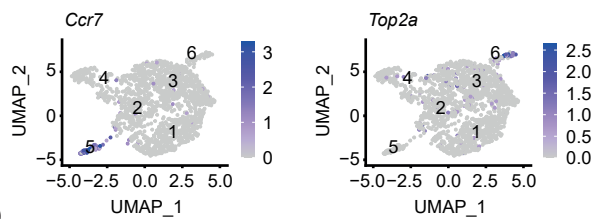

**D**

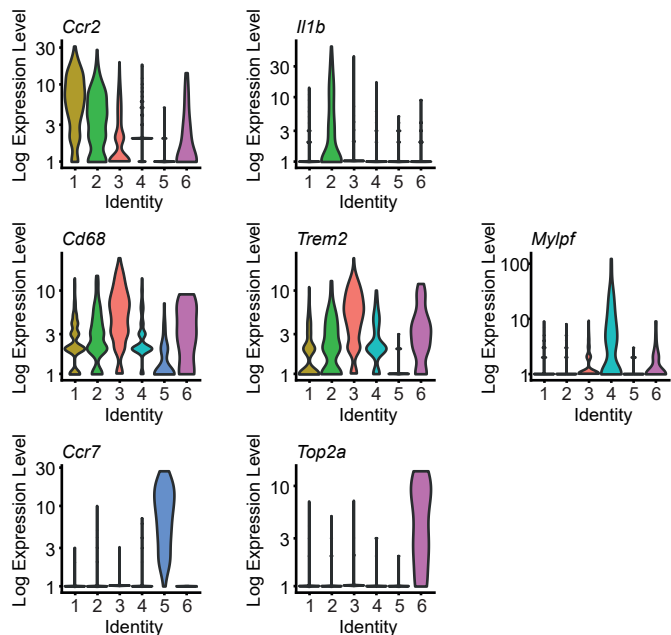

**Supplementary Figure 6: Muscle injury results in the differentiation of pro-resolving macrophages. Related to Figure 6.**

(A) Gating strategy during FACS-based sort of mononuclear phagocytes prior to scRNAseq.

(B) Heatmap of the top 10 cluster markers in the identified clusters based on scRNAseq analysis of mononuclear phagocytes.

(C) UMAP visualization of the clustermarkers *Ccr7* and *Top2a*.

(D) Violin plot visualization of the cluster markers *Ccr2*, *Il1b*, *Cd68*, *Trem2*, *Mylpf*, *Ccr7* and *Top2a*.

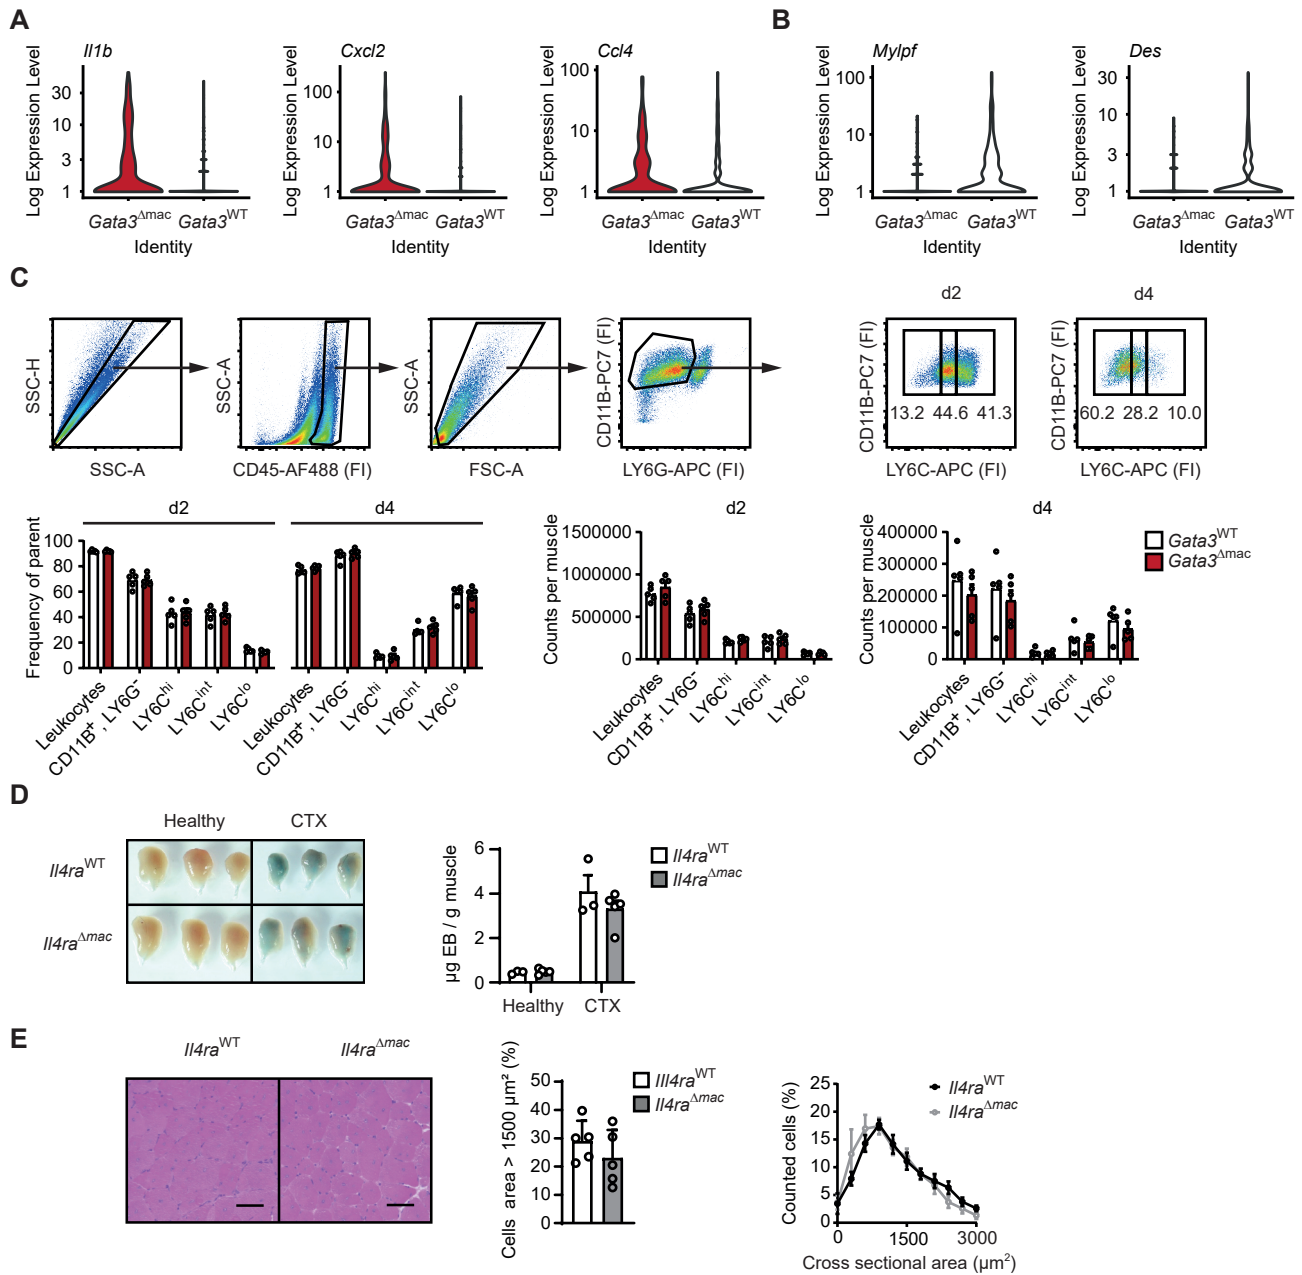

**Supplementary Figure 7: GATA3 controls the differentiation of pro-resolving macrophages upon muscle injury. Related to Figure 7.**

(A-B) Violin plot visualization of differentially expressed genes *Il1b*, *Cxcl2* & *Ccl4* in Cluster 1 & 2 (A) and *Mylpf* & *Des* in Cluster 3 & 4 (B).

(C) Flow cytometry of injured muscles day 2 and day 4 post CTX injection. Gated on single Dapi<sup>-</sup>CD45<sup>+</sup>CD11B<sup>+</sup>LY6G<sup>-</sup> mononuclear phagocytes. Graphs show frequency of cells as well as absolute counts per muscle. *Gata3<sup>WT</sup>* (n=5) and *Gata3<sup>Δmac</sup>* (n=5) mice.

(D) Macroscopic pictures and quantification of Evans Blue accumulation in healthy and CTX injected muscles of *Il4ra<sup>WT</sup>* (n=3) *Il4ra<sup>Δmac</sup>* (n=4) mice on day 7 after injury.

(E) Histology, quantification and comparison of cross sectional areas from muscle sections of CTX injected *Il4ra<sup>WT</sup>* (n=5) and *Il4ra<sup>Δmac</sup>* (n=5) mice on day 14 after injury. Scale bar indicates 50  $\mu\text{m}$ .

Data are presented as mean + SEM.

**Supplementary Table 1: Top 50 DEG of bulk mRNA-Seq: *Gata3*<sup>Δmac</sup> IL-33 vs WT IL-33. Related to Figure 5.**

| Gene                | KoIL33.value | WtIL33.value | log2foldchange | pvalue    | padjust   | significance | gene_name             |
|---------------------|--------------|--------------|----------------|-----------|-----------|--------------|-----------------------|
| ENSMUSG00000019987  | 28,18572395  | 256,2393468  | -3,184455364   | 4,13E-166 | 7,02E-162 | TRUE         | <i>Arg1</i>           |
| ENSMUSG00000020334  | 35,8700529   | 3,722795792  | 3,268321507    | 3,05E-146 | 2,59E-142 | TRUE         | <i>Slc22a4</i>        |
| ENSMUSG00000030117  | 61,92927071  | 13,25108873  | 2,224510594    | 3,11E-82  | 1,77E-78  | TRUE         | <i>Gdf3</i>           |
| ENSMUSG00000038085  | 4,854883006  | 18,64067379  | -1,940945456   | 3,68E-46  | 7,83E-43  | TRUE         | <i>Cnbd2</i>          |
| ENSMUSG00000020388  | 7,019206263  | 23,82490298  | -1,763090434   | 8,48E-42  | 1,44E-38  | TRUE         | <i>Pdlim4</i>         |
| ENSMUSG00000025453  | 11,52867296  | 29,50779923  | -1,355869793   | 2,11E-39  | 3,13E-36  | TRUE         | <i>Nnt</i>            |
| ENSMUSG00000078566  | 109,4056215  | 300,1749391  | -1,456116569   | 2,21E-39  | 3,13E-36  | TRUE         | <i>Bnip3</i>          |
| ENSMUSG00000007682  | 2,293531838  | 0,438762612  | 2,386058486    | 3,11E-34  | 4,07E-31  | TRUE         | <i>Dio2</i>           |
| ENSMUSG000000025150 | 92,98250155  | 249,5839192  | -1,424493733   | 1,15E-33  | 1,39E-30  | TRUE         | <i>Cbr2</i>           |
| ENSMUSG000000063458 | 8,566913697  | 1,393083277  | 2,620494092    | 5,31E-33  | 6,02E-30  | TRUE         | <i>1700112E06Rik</i>  |
| ENSMUSG000000033207 | 13,63871071  | 5,121529565  | 1,413060674    | 6,30E-32  | 6,70E-29  | TRUE         | <i>Mamdc2</i>         |
| ENSMUSG000000035448 | 1,623918233  | 5,065208045  | -1,641142423   | 8,02E-32  | 8,02E-29  | TRUE         | <i>Ccr3</i>           |
| ENSMUSG000000102418 | 1,247948877  | 4,592171429  | -1,879617487   | 3,58E-26  | 3,38E-23  | TRUE         | <i>Sh2d1b1</i>        |
| ENSMUSG000000006154 | 2,01118574   | 7,092829426  | -1,818314771   | 4,52E-26  | 4,05E-23  | TRUE         | <i>Eps8l1</i>         |
| ENSMUSG000000035352 | 12,24681893  | 40,1043899   | -1,711352929   | 1,81E-24  | 1,46E-21  | TRUE         | <i>Ccl12</i>          |
| ENSMUSG000000055782 | 7,435101632  | 15,00573897  | -1,013089932   | 5,77E-24  | 4,46E-21  | TRUE         | <i>Abcd2</i>          |
| ENSMUSG000000021796 | 1,945109035  | 0,276789395  | 2,812990473    | 8,76E-24  | 6,48E-21  | TRUE         | <i>Bmpr1a</i>         |
| ENSMUSG000000057897 | 1,751098911  | 5,384034886  | -1,620427036   | 1,70E-23  | 1,20E-20  | TRUE         | <i>Camk2b</i>         |
| ENSMUSG000000078636 | 17,42644779  | 36,41041773  | -1,063072696   | 2,94E-21  | 2,00E-18  | TRUE         | <i>Gm7336</i>         |
| ENSMUSG000000031762 | 22,10234377  | 52,80182562  | -1,25638834    | 5,52E-21  | 3,61E-18  | TRUE         | <i>Mt2</i>            |
| ENSMUSG000000107470 | 10,75528861  | 3,316213988  | 1,6974373      | 1,45E-20  | 9,11E-18  | TRUE         | <i>CAAA01093177.1</i> |
| ENSMUSG000000022797 | 24,12819791  | 48,9716407   | -1,021226281   | 2,96E-20  | 1,80E-17  | TRUE         | <i>Tfrc</i>           |
| ENSMUSG000000000318 | 185,9549149  | 426,0529443  | -1,196079705   | 5,61E-20  | 3,29E-17  | TRUE         | <i>Clec10a</i>        |
| ENSMUSG000000028238 | 140,1082251  | 79,65497123  | 0,814705387    | 1,06E-19  | 6,00E-17  | TRUE         | <i>Atp6v0d2</i>       |
| ENSMUSG000000003420 | 64,56517434  | 128,5967098  | -0,994025533   | 1,67E-19  | 9,16E-17  | TRUE         | <i>Fcgrt</i>          |
| ENSMUSG000000035105 | 10,91792767  | 21,80570458  | -0,998006483   | 2,51E-19  | 1,33E-16  | TRUE         | <i>Egln3</i>          |
| ENSMUSG000000021876 | 77,52722238  | 161,7081794  | -1,060617662   | 6,83E-19  | 3,52E-16  | TRUE         | <i>Rnase4</i>         |
| ENSMUSG000000003541 | 41,98758642  | 80,54520099  | -0,939835696   | 2,04E-18  | 1,02E-15  | TRUE         | <i>Ier3</i>           |
| ENSMUSG000000047945 | 56,61355528  | 111,9269268  | -0,98337631    | 2,27E-18  | 1,10E-15  | TRUE         | <i>Marcks1l</i>       |
| ENSMUSG000000019478 | 3,070223     | 8,875086485  | -1,531417565   | 2,78E-18  | 1,31E-15  | TRUE         | <i>Rab4a</i>          |
| ENSMUSG000000029648 | 1,366480588  | 4,439570119  | -1,699954799   | 4,79E-18  | 2,20E-15  | TRUE         | <i>Fit1</i>           |
| ENSMUSG000000072812 | 21,49373647  | 11,53429996  | 0,897985906    | 9,98E-18  | 4,46E-15  | TRUE         | <i>Ahnak2</i>         |
| ENSMUSG000000006611 | 81,41059172  | 152,2018523  | -0,902697424   | 1,97E-17  | 8,59E-15  | TRUE         | <i>Hfe</i>            |
| ENSMUSG000000017009 | 81,88377907  | 151,0950033  | -0,883806279   | 2,17E-17  | 9,24E-15  | TRUE         | <i>Sdc4</i>           |
| ENSMUSG000000026656 | 163,8620189  | 316,8460657  | -0,951300507   | 2,29E-17  | 9,50E-15  | TRUE         | <i>Fcgr2b</i>         |
| ENSMUSG000000002992 | 83,80184708  | 161,8411135  | -0,949524118   | 2,97E-17  | 1,20E-14  | TRUE         | <i>Apoc2</i>          |
| ENSMUSG000000062300 | 5,276031178  | 11,91824497  | -1,175646692   | 1,02E-16  | 4,02E-14  | TRUE         | <i>Pvrl2</i>          |
| ENSMUSG000000055546 | 1,00957662   | 0,0410397    | 4,620585412    | 1,38E-16  | 5,32E-14  | TRUE         | <i>Timd4</i>          |
| ENSMUSG000000040950 | 118,4775656  | 257,674771   | -1,120937242   | 1,95E-16  | 7,37E-14  | TRUE         | <i>Mgl2</i>           |
| ENSMUSG000000003617 | 8,644884109  | 20,15231262  | -1,221026739   | 2,10E-16  | 7,75E-14  | TRUE         | <i>Cp</i>             |
| ENSMUSG000000028793 | 88,78423853  | 155,2790714  | -0,806487835   | 2,23E-16  | 8,08E-14  | TRUE         | <i>Rnf19b</i>         |
| ENSMUSG000000026069 | 2,091331688  | 5,510735325  | -1,397822778   | 2,38E-16  | 8,43E-14  | TRUE         | <i>Il1rl1</i>         |
| ENSMUSG000000059089 | 41,93413672  | 82,56182556  | -0,977349617   | 3,22E-16  | 1,12E-13  | TRUE         | <i>Fcgr4</i>          |
| ENSMUSG000000003882 | 71,6436439   | 42,43242979  | 0,75567147     | 3,64E-16  | 1,24E-13  | TRUE         | <i>Il1r</i>           |

**Supplementary Table 2: Selection of DEG of cluster 1 & 2 single cell mRNA-Seq: *Gata3*<sup>Δmac</sup> vs *Gata3*<sup>WT</sup>. Related to Figure 7.**

| Gene            | p-value     | avg_log Fold Change | pct.1 | pct.2 | p-value_adj |
|-----------------|-------------|---------------------|-------|-------|-------------|
| <i>Bst2</i>     | 7,79E-55    | -0,922105662        | 0,749 | 0,964 | 9,98E-51    |
| <i>Rpsa</i>     | 1,22E-49    | 0,75841808          | 1     | 1     | 1,56E-45    |
| <i>Irf7</i>     | 7,68E-49    | -0,943696673        | 0,697 | 0,974 | 9,83E-45    |
| <i>Ly6a</i>     | 1,12E-39    | -1,220394035        | 0,39  | 0,816 | 1,44E-35    |
| <i>Isg15</i>    | 1,51E-36    | -1,065079849        | 0,498 | 0,849 | 1,93E-32    |
| <i>Oasl2</i>    | 1,89E-34    | -0,668862127        | 0,414 | 0,839 | 2,42E-30    |
| <i>Ifi2712a</i> | 7,44E-34    | -0,838419641        | 0,948 | 0,974 | 9,53E-30    |
| <i>H2-T23</i>   | 2,76E-32    | -0,620067241        | 0,749 | 0,941 | 3,53E-28    |
| <i>Ly6e</i>     | 4,10E-32    | -0,529727654        | 0,944 | 0,997 | 5,25E-28    |
| <i>Zbp1</i>     | 1,29E-31    | -0,744740883        | 0,227 | 0,686 | 1,65E-27    |
| <i>Ms4a4c</i>   | 5,55E-31    | -0,765281371        | 0,757 | 0,964 | 7,11E-27    |
| <i>Ifitm3</i>   | 3,42E-29    | -0,836476795        | 0,88  | 0,992 | 4,38E-25    |
| <i>Ifit3</i>    | 1,13E-28    | -0,634556154        | 0,131 | 0,599 | 1,45E-24    |
| <i>Cd52</i>     | 1,85E-27    | -0,512613666        | 0,988 | 0,997 | 2,37E-23    |
| <i>Rtp4</i>     | 8,09E-27    | -0,584426091        | 0,219 | 0,645 | 1,04E-22    |
| <i>Mndal</i>    | 1,03E-26    | -0,589421296        | 0,697 | 0,936 | 1,32E-22    |
| <i>Rnf213</i>   | 1,76E-25    | -0,551400272        | 0,39  | 0,77  | 2,25E-21    |
| <i>Gdgd3</i>    | 2,78E-25    | 0,490459174         | 0,426 | 0,087 | 3,56E-21    |
| <i>Tap1</i>     | 3,51E-25    | -0,534764172        | 0,526 | 0,849 | 4,49E-21    |
| <i>Psme1</i>    | 3,64E-25    | -0,485648624        | 0,745 | 0,918 | 4,66E-21    |
| <i>Stat1</i>    | 4,72E-25    | -0,620264632        | 0,586 | 0,855 | 6,04E-21    |
| <i>Ifi209</i>   | 5,71E-25    | -0,592905246        | 0,347 | 0,74  | 7,31E-21    |
| <i>Ifi213</i>   | 3,02E-21    | -0,526277509        | 0,215 | 0,587 | 3,87E-17    |
| <i>Ifit2</i>    | 1,05E-20    | -0,538789675        | 0,104 | 0,464 | 1,34E-16    |
| <i>Ifi211</i>   | 5,01E-20    | -0,594594002        | 0,167 | 0,526 | 6,41E-16    |
| <i>Ifi203</i>   | 1,68E-18    | -0,561467841        | 0,622 | 0,827 | 2,15E-14    |
| <i>Ifi47</i>    | 3,76E-18    | -0,523591657        | 0,131 | 0,464 | 4,81E-14    |
| <i>Ifi204</i>   | 6,71E-17    | -0,539090752        | 0,514 | 0,763 | 8,59E-13    |
| <i>Irgm1</i>    | 3,89E-14    | -0,345399493        | 0,175 | 0,467 | 4,98E-10    |
| <i>Fcgr3</i>    | 4,72E-13    | 0,4269541           | 0,677 | 0,449 | 6,05E-09    |
| <i>Fcgr1</i>    | 1,19E-12    | -0,421277073        | 0,673 | 0,811 | 1,52E-08    |
| <i>Ifit1</i>    | 1,82E-12    | -0,328662218        | 0,116 | 0,372 | 2,33E-08    |
| <i>Ifih1</i>    | 2,97E-11    | -0,34846243         | 0,211 | 0,452 | 3,81E-07    |
| <i>Ifit3b</i>   | 8,06E-11    | -0,285327984        | 0,076 | 0,296 | 1,03E-06    |
| <i>Ifi35</i>    | 1,70E-10    | -0,309858637        | 0,167 | 0,395 | 2,18E-06    |
| <i>Cxcl2</i>    | 1,10E-09    | 0,99093868          | 0,319 | 0,125 | 1,40E-05    |
| <i>Cxcr4</i>    | 8,57E-09    | 0,504516501         | 0,498 | 0,311 | 0,00010973  |
| <i>Il1b</i>     | 3,54E-08    | 0,841298864         | 0,414 | 0,23  | 0,000453888 |
| <i>Axl</i>      | 7,25E-08    | -0,293567623        | 0,295 | 0,508 | 0,000928418 |
| <i>Fcgr4</i>    | 1,28E-07    | -0,392603961        | 0,191 | 0,37  | 0,001644576 |
| <i>Ccl3</i>     | 1,50E-06    | 0,377897695         | 0,418 | 0,245 | 0,019176719 |
| <i>Hspa1a</i>   | 1,50E-06    | 0,534219858         | 0,514 | 0,339 | 0,019238627 |
| <i>Jun</i>      | 1,93E-06    | 0,382034081         | 0,857 | 0,758 | 0,024715738 |
| <i>Ccl5</i>     | 2,10E-06    | -0,442490807        | 0,064 | 0,204 | 0,026945075 |
| <i>Cxcl10</i>   | 1,01E-05    | -0,598575473        | 0,131 | 0,283 | 0,129591767 |
| <i>Tnf</i>      | 5,24E-05    | 0,269410362         | 0,327 | 0,189 | 0,670929582 |
| <i>Ccl4</i>     | 0,000312829 | 0,265508646         | 0,39  | 0,255 | 1           |

**Supplementary Table 3: Selection of DEG of cluster 3 & 4 single cell mRNA-Seq: *Gata3*<sup>Δmac</sup> vs *Gata3*<sup>WT</sup>. Related to Figure 7.**

| Gene            | p-value  | avg_log Fold Change | pct.1 | pct.2 | p-value_adj |
|-----------------|----------|---------------------|-------|-------|-------------|
| <i>Irf7</i>     | 1,51E-59 | -0,94634987         | 0,626 | 0,956 | 1,93E-55    |
| <i>Bst2</i>     | 3,78E-53 | -0,747370464        | 0,783 | 0,974 | 4,84E-49    |
| <i>Isg15</i>    | 3,56E-51 | -0,722320006        | 0,38  | 0,875 | 4,56E-47    |
| <i>Irf2712a</i> | 3,89E-45 | -0,787347612        | 0,869 | 0,982 | 4,99E-41    |
| <i>Irfm3</i>    | 2,44E-43 | -0,709938323        | 0,734 | 0,986 | 3,13E-39    |
| <i>Stat1</i>    | 5,61E-38 | -0,71212172         | 0,511 | 0,855 | 7,18E-34    |
| <i>Gdgd3</i>    | 2,04E-35 | 0,51300769          | 0,434 | 0,082 | 2,61E-31    |
| <i>Zbp1</i>     | 2,93E-32 | -0,500065186        | 0,291 | 0,687 | 3,75E-28    |
| <i>Rnf213</i>   | 6,69E-32 | -0,514377234        | 0,417 | 0,779 | 8,56E-28    |
| <i>Cd52</i>     | 2,01E-31 | -0,537662375        | 0,934 | 0,984 | 2,57E-27    |
| <i>Mndal</i>    | 2,83E-30 | -0,577262942        | 0,586 | 0,869 | 3,62E-26    |
| <i>Ms4a4c</i>   | 1,64E-29 | -0,572422457        | 0,514 | 0,845 | 2,10E-25    |
| <i>Oasl2</i>    | 1,88E-28 | -0,469775084        | 0,36  | 0,729 | 2,40E-24    |
| <i>Parp14</i>   | 3,24E-28 | -0,55145509         | 0,46  | 0,785 | 4,15E-24    |
| <i>Rpsa</i>     | 2,57E-27 | 0,396356428         | 1     | 0,998 | 3,29E-23    |
| <i>Irfi3</i>    | 9,07E-26 | -0,549044796        | 0,171 | 0,522 | 1,16E-21    |
| <i>Psme1</i>    | 2,76E-25 | -0,411134172        | 0,706 | 0,904 | 3,54E-21    |
| <i>Irfi2</i>    | 4,61E-25 | -0,53293392         | 0,089 | 0,414 | 5,91E-21    |
| <i>Ly6a</i>     | 5,61E-25 | -0,664046473        | 0,277 | 0,618 | 7,19E-21    |
| <i>Mylpf</i>    | 1,99E-13 | -0,873205785        | 0,206 | 0,444 | 2,55E-09    |
| <i>Myl1</i>     | 8,24E-11 | -0,551379478        | 0,097 | 0,277 | 1,06E-06    |
| <i>Tnnt3</i>    | 6,71E-10 | -0,462079469        | 0,1   | 0,269 | 8,60E-06    |
| <i>Cxcl2</i>    | 6,28E-09 | 0,864771488         | 0,203 | 0,072 | 8,04E-05    |
| <i>Myl4</i>     | 8,16E-08 | -0,449214483        | 0,1   | 0,239 | 0,001045451 |
| <i>Tnnc2</i>    | 1,78E-07 | -0,567631916        | 0,123 | 0,265 | 0,002280418 |
| <i>Tnnt2</i>    | 2,06E-07 | -0,379696815        | 0,089 | 0,221 | 0,002643482 |
| <i>Il1b</i>     | 4,89E-07 | 0,406165008         | 0,214 | 0,094 | 0,006259744 |
| <i>Des</i>      | 2,16E-06 | -0,343728928        | 0,131 | 0,259 | 0,027656506 |

**Supplementary Table 4: Primer sequences for qPCR. Related to STAR Methods.**

| <b>Target</b> | <b>Forward 5'- 3'</b>      | <b>Reverse 5'- 3'</b>      |
|---------------|----------------------------|----------------------------|
| <i>Actb</i>   | TGTCCACCTTCCAGCAGATGT      | AGCTCAGTAACAGTCCGCCTAGA    |
| <i>Arg1</i>   | TTT TAG GGT TAC GGC CGG TG | CCT CGA GGC TGT CCT TTT GA |
| <i>Chil3</i>  | CCAGCAGAAGCTCCTCCAGAAG     | CTCCCTTCTATTGGC CTGTCC     |
| <i>Gata3</i>  | CAATCTGACCGGGCAGGT         | CAGAGACGGTTGCTCTTCCG       |
| <i>Retn1a</i> | AGGAACTTCTTGCCAATCCAG      | AGTCAACGAGTAAGCACAGG       |
| <i>Tnfa</i>   | GCTGAGCTCAAACCCTGGTA       | CGGACTCCGCAAAGTCTAAG       |
| <i>Ucp1</i>   | CGACTCAGTCCAAGAGTACTTCTTTC | GCCGGCTGAGATCTTGTTTC       |
| <i>Ucp2</i>   | TCCCCTGTTGATGTGGTCAA       | CAGTGACCTGCGCTGTGGTA       |
| <i>Ucp3</i>   | CCTACGACATCATCAAGGAGAAGTT  | TCCAAAGGCAGAGACAAAGTGA     |
| <i>Ucp4</i>   | GAATGCCTATCGCCGAGGA        | AGTAGGAACTTGCTCGTCCGG      |
| <i>Ucp5</i>   | TCCCAACTGCTCAGCGTG         | GGTGCTTCTTGTAATATCATAAACG  |
| <i>Il1b</i>   | ATGAAGGGCTGCTTCCAAAC       | ATGTGCTGCTGCGAGATTTG       |
| <i>Il6</i>    | TCC TTC CTA CCC CAA TTT CC | GCC ACT CCT TCT GTG ACT CC |
| <i>Irg1</i>   | GCG AAC GCT GCC ACT CA     | ATC CCA GGC TTG GAA GGT C  |
